# Supplementary material for: Structurally diverse zinc(ii) complexes containing tripodal tetradentate phenoxido-amines with promising antiproliferative effects
Source: Royal Society of Chemistry journal article supplement (doi:10.1039/d4dt00942h), 2024-01-01
Supplement: d4dt00942h1.pdf [file d4dt00942h1.pdf]

## ELECTRONIC SUPPLEMENTARY INFORMATION (ESI)

### Structurally diverse zinc(II) complexes containing tripodal tetradentate phenoxido-amines with promising antiproliferative effects<sup>†</sup>

Salah S. Massoud,<sup>\*a,b</sup> Franz A. Mautner,<sup>\*c</sup> Febbe R. Louka,<sup>a</sup> Nahed M. H. Salem,<sup>b</sup>  
Roland C. Fischer,<sup>d</sup> Ana Torvisco,<sup>d</sup> Ján Vančo,<sup>e</sup> Jan Belza,<sup>e</sup> Zdeněk Dvořák<sup>f</sup>  
and Zdeněk Trávníček<sup>\*,e</sup>

*The authors would like to dedicate this work to Jan Belza, our beloved colleague and friend, who passed away unexpectedly at the age of 31 years.*

- <sup>a</sup> Department of Chemistry, University of Louisiana at Lafayette, P.O. Box 43700, Lafayette, LA 70504, U. S. A.  
<sup>b</sup> Department of Chemistry, Faculty of Science, Alexandria University, Moharam Bey 21511, Alexandria, Egypt  
<sup>c</sup> Institut für Physikalische and Theoretische Chemie, Technische Universität Graz, Stremayrgasse 9/II, A-8010, Graz, Austria  
<sup>d</sup> Institut für Anorganische Chemische, Technische Universität Graz, Stremayrgasse 9/V, A-8010 Graz, Austria  
<sup>e</sup> Czech Advanced Technology and Research Institute, Regional Centre of Advanced Technologies and Materials, Palacký University, Šlechtitelů 27, CZ-779 00 Olomouc, Czech Republic  
<sup>f</sup> Department of Cell Biology and Genetics, Faculty of Science, Palacký University, Šlechtitelů 27, CZ-783 71 Olomouc, Czech Republic

| Contents                                                                                                                        | page # |
|---------------------------------------------------------------------------------------------------------------------------------|--------|
| <b>Synthesis of H<sub>2</sub>L<sup>3</sup></b> .....                                                                            | 2      |
| <b>Fig. S1.</b> IR spectrum of H <sub>2</sub> L <sup>3</sup> . .....                                                            | 4      |
| <b>Fig. S2.</b> <sup>1</sup> H NMR spectra of H <sub>2</sub> L <sup>3</sup> in d <sub>6</sub> -DMSO.....                        | 5      |
| <b>Fig. S3.</b> ESI-MS of H <sub>2</sub> L <sup>3</sup> in CH <sub>3</sub> OH. ....                                             | 6      |
| <b>Fig. S4.</b> IR spectrum of [Zn <sub>2</sub> (L <sup>1</sup> ) <sub>2</sub> ](ClO <sub>4</sub> ) <sub>2</sub> <b>1</b> ..... | 7      |
| <b>Fig. S5.</b> IR spectrum of [Zn <sub>2</sub> (L <sup>2</sup> ) <sub>2</sub> ](ClO <sub>4</sub> ) <sub>2</sub> <b>2</b> ..... | 8      |
| <b>Fig. S6.</b> IR spectrum of [Zn(L <sup>3</sup> )(H <sub>2</sub> O)]·CH <sub>3</sub> OH <b>3</b> .....                        | 9      |
| <b>Fig. S7.</b> IR spectrum of <b>4</b> .....                                                                                   | 10     |
| <b>Fig. S8.</b> IR spectrum of <b>5</b> .....                                                                                   | 11     |
| <b>Fig. S9.</b> IR spectrum of <b>6</b> .....                                                                                   | 12     |
| <b>Fig. S10.</b> ESI-MS of H <sub>2</sub> L <sup>4</sup> in CH <sub>3</sub> OH.....                                             | 13     |
| <b>Fig. S11.</b> ESI-SM of complex <b>3</b> in CH <sub>3</sub> CN. ....                                                         | 13     |
| <b>Fig. S12.</b> ESI-MS of complex <b>4</b> in CH <sub>3</sub> CN. ....                                                         | 14     |
| <b>Fig. S13.</b> ESI-MS of complex <b>5</b> in CH <sub>3</sub> CN. ....                                                         | 14     |

|                                                                                                                                                                                                                                                      |    |
|------------------------------------------------------------------------------------------------------------------------------------------------------------------------------------------------------------------------------------------------------|----|
| <b>Fig. S14.</b> ESI-MS of complex <b>6</b> in CH <sub>3</sub> CN .....                                                                                                                                                                              | 15 |
| <b>Fig. S15.</b> ESI-MS of complex <b>1</b> in CH <sub>3</sub> CN .....                                                                                                                                                                              | 15 |
| <b>Fig. S16.</b> ESI-MS of complex <b>2</b> in CH <sub>3</sub> CN/HCOOH (1:1) mixture .....                                                                                                                                                          | 16 |
| <b>Fig. S17.</b> UV spectrum of <b>1</b> in MeOH .....                                                                                                                                                                                               | 16 |
| <b>Fig. S18.</b> UV spectrum of <b>2</b> in CH <sub>3</sub> CN (top) and in DMSO (bottom) .....                                                                                                                                                      | 17 |
| <b>Fig. S19.</b> UV spectrum of <b>4</b> in CH <sub>3</sub> CN .....                                                                                                                                                                                 | 18 |
| <b>Fig. S20:</b> ORTEP view of complex <b>1</b> showing disordered parts<br>of the complex. ....                                                                                                                                                     | 18 |
| <b>Fig. S21.</b> Packing plot of <b>1</b> .....                                                                                                                                                                                                      | 19 |
| <b>Fig. S22.</b> Packing plot of <b>2</b> .....                                                                                                                                                                                                      | 19 |
| <b>Fig. S23.</b> Packing plot of <b>3</b> .....                                                                                                                                                                                                      | 20 |
| <b>Fig. S24.</b> Packing plot of <b>4</b> .....                                                                                                                                                                                                      | 20 |
| <b>Fig. S25.</b> Packing plot of <b>5</b> .....                                                                                                                                                                                                      | 21 |
| <b>Fig. S26.</b> Packing plot of <b>6</b> .....                                                                                                                                                                                                      | 21 |
| <b>Fig. S27.</b> <sup>1</sup> H NMR spectrum of free <b>H<sub>2</sub>L<sup>4</sup></b> measured in CDCl <sub>3</sub> . ....                                                                                                                          | 22 |
| <b>Fig. S28.</b> <sup>13</sup> C NMR spectrum of free <b>H<sub>2</sub>L<sup>4</sup></b> measured in CDCl <sub>3</sub> . ....                                                                                                                         | 22 |
| <b>Fig. S29.</b> <sup>1</sup> H NMR spectrum of [Zn(L <sup>4</sup> )] ( <b>4</b> ) measured in CDCl <sub>3</sub> immediately after the sample<br>dissolution. ....                                                                                   | 23 |
| <b>Fig. S30.</b> <sup>1</sup> H NMR spectrum of [Zn(L <sup>4</sup> )] ( <b>4</b> ) measured in CDCl <sub>3</sub> 22 h after<br>the sample dissolution. ....                                                                                          | 23 |
| <b>Fig. S31.</b> <sup>1</sup> H NMR spectrum of [Zn(L <sup>4</sup> )] ( <b>4</b> ) measured in CDCl <sub>3</sub> 6 days after the sample<br>dissolution. ....                                                                                        | 24 |
| <b>Fig. S32.</b> <sup>13</sup> C NMR spectrum of [Zn(L <sup>4</sup> )] ( <b>4</b> ) measured in CDCl <sub>3</sub> immediately after the sample<br>dissolution. ....                                                                                  | 24 |
| <b>Fig. S33.</b> <sup>13</sup> C NMR spectrum of [Zn(L <sup>4</sup> )] ( <b>4</b> ) measured in CDCl <sub>3</sub> 22 h after the sample<br>dissolution. *The selected signals belonging to the free <b>H<sub>2</sub>L<sup>4</sup></b> ligand. ....   | 25 |
| <b>Fig. S34.</b> <sup>13</sup> C NMR spectrum of [Zn(L <sup>4</sup> )] ( <b>4</b> ) measured in CDCl <sub>3</sub> 6 days after the sample<br>dissolution. *The selected signals belonging to the free <b>H<sub>2</sub>L<sup>4</sup></b> ligand. .... | 25 |
| <b>Fig. S35.</b> The effect of complexes <b>2</b> , <b>3</b> and <b>5</b> , and ligand <b>H<sub>2</sub>L<sup>6</sup></b> on intracellular<br>levels of zinc in A2780 cells .....                                                                     | 26 |

**Synthesis of 6,6'-(((2-(Dimethylamino)ethyl)azanediyl)bis(methylene))bis(2-(*tert*-butyl)-4-methylphenol), **H<sub>2</sub>L<sup>3</sup>**.**

A mixture of 2-*tert*-butyl-4-methylphenol (8.213 g, 50 mmol), Et<sub>3</sub>N (5.052 g, 50 mmol), 37% HCHO (4.173 g, 50 mmol) and *N,N*-dimethylethylenediamine (2.204 g, 25 mmol) was dissolved in methanol (60 mL). The reaction mixture was stirred under gentle reflux for 3 days, then the solution was reduced to half of its volume by a rotary evaporator. The white precipitate, which was obtained was collected by filtration, recrystallized from EtOAc, washed with Et<sub>2</sub>O, and air dried (yield: 4.85 g, 47.7 %). Characterization: Anal. Calcd for C<sub>28</sub>H<sub>44</sub>N<sub>2</sub>O<sub>2</sub> (MM = 441.3489 g/mol): C, 76.32; H, 10.06; N, 6.36%. Found: C, 76.50; H, 10.24; N, 6.35%. m.p. 167-170° C. ESI-MS (MeOH): *m/z* = 469.3804 (100%), Calcd [**H<sub>2</sub>L<sup>3</sup>+H**]<sup>+</sup> = 441.34812. IR bands (ATR, cm<sup>-1</sup>): ~3200 (sh) ν(O-H); 2947 (m), 2917 (vw), 2867 (vw), 2810 (w)

$\nu(\text{C-H})$ ; 1570 (vw)  $\nu(\text{C=N})$ ; 1465 (s), 1442 (s), 1371 (s), 1354 (s)  $\nu(\text{C=C, C-N, C-O})$ ; 1226 (vs), 1200(s), 1186 (s), 1123 (m), 1105 (m), 1043 (m), 984 (m), 762 (s), 470 (m), 429 (m), 418 (vs).  $^1\text{H}$  NMR ( $d_6$ -DMSO, 400 MHz,  $\delta$  in ppm):  $\delta = 6.89, 6.76$  (s, 1H each, protons-ph); 3.51, 3.17 (s, 2H, N-CH<sub>2</sub>-ph); 2.20, 2.17 (s, 3H, CH<sub>3</sub>-N; 8H, N-CH<sub>2</sub>-CH<sub>2</sub>-N); CH<sub>3</sub>-ph); 1.32 (s, 9H, (CH<sub>3</sub>)<sub>3</sub>C).

---

Peak Find - 3830.jws

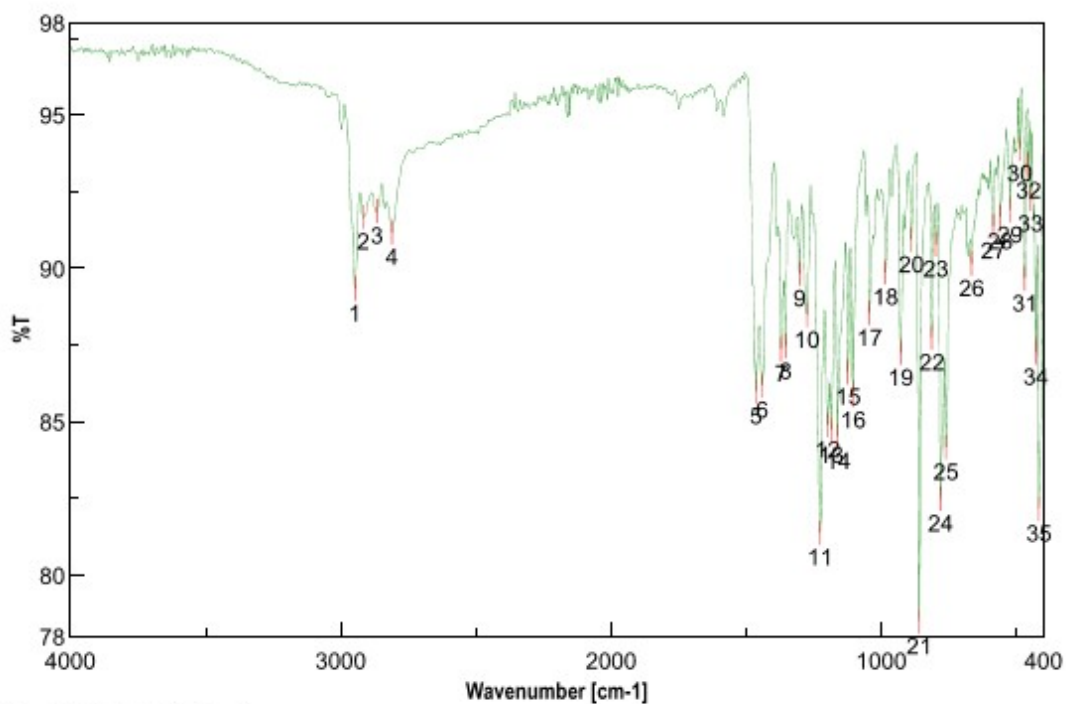

[ Result of Peak Picking ]

| No. | Position | Intensity | No. | Position | Intensity |
|-----|----------|-----------|-----|----------|-----------|
| 1   | 2946.7   | 89        | 2   | 2916.81  | 92        |
| 3   | 2866.67  | 92        | 4   | 2809.78  | 91        |
| 5   | 1464.67  | 86        | 6   | 1441.53  | 86        |
| 7   | 1371.14  | 87        | 8   | 1354.75  | 87        |
| 9   | 1302.68  | 90        | 10  | 1274.72  | 88        |
| 11  | 1226.5   | 81        | 12  | 1199.51  | 85        |
| 13  | 1186.01  | 85        | 14  | 1160.94  | 85        |
| 15  | 1123.33  | 87        | 16  | 1105.01  | 86        |
| 17  | 1043.3   | 89        | 18  | 984.482  | 90        |
| 19  | 928.557  | 87        | 20  | 889.987  | 91        |
| 21  | 860.096  | 78        | 22  | 813.813  | 88        |
| 23  | 798.385  | 91        | 24  | 781.029  | 82        |
| 25  | 761.744  | 84        | 26  | 666.285  | 90        |
| 27  | 586.254  | 91        | 28  | 561.184  | 92        |
| 29  | 524.543  | 92        | 30  | 488.866  | 94        |
| 31  | 469.582  | 90        | 32  | 456.082  | 93        |
| 33  | 448.369  | 92        | 34  | 429.084  | 87        |
| 35  | 417.513  | 82        |     |          |           |

Fig. S1. IR spectrum of H<sub>2</sub>L<sup>3</sup>.

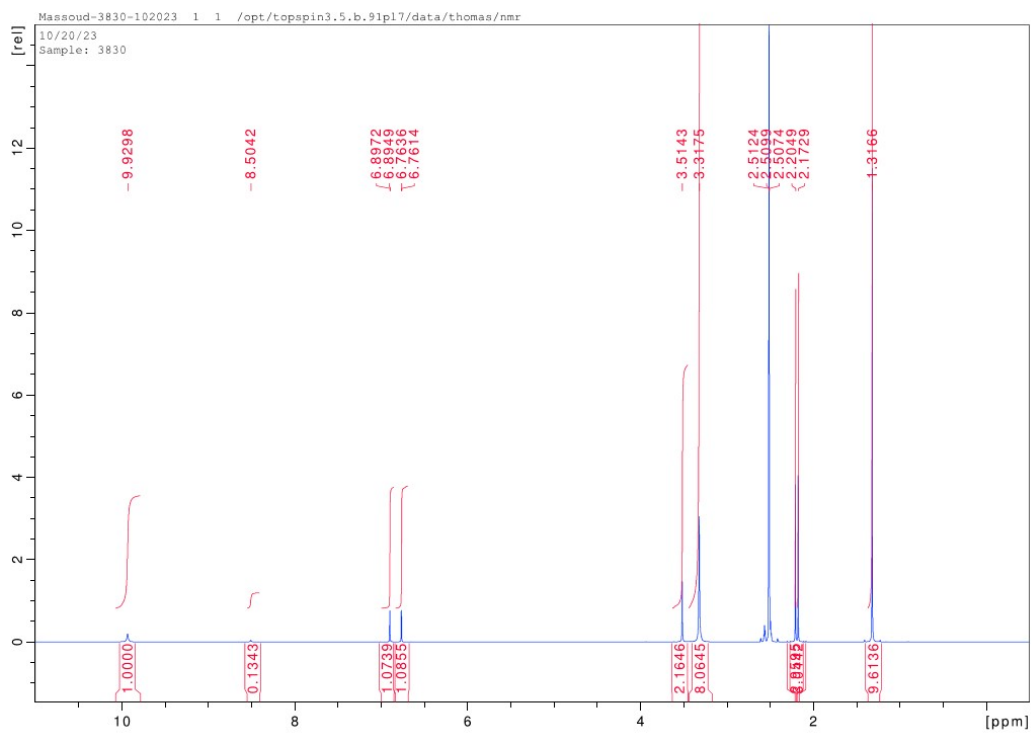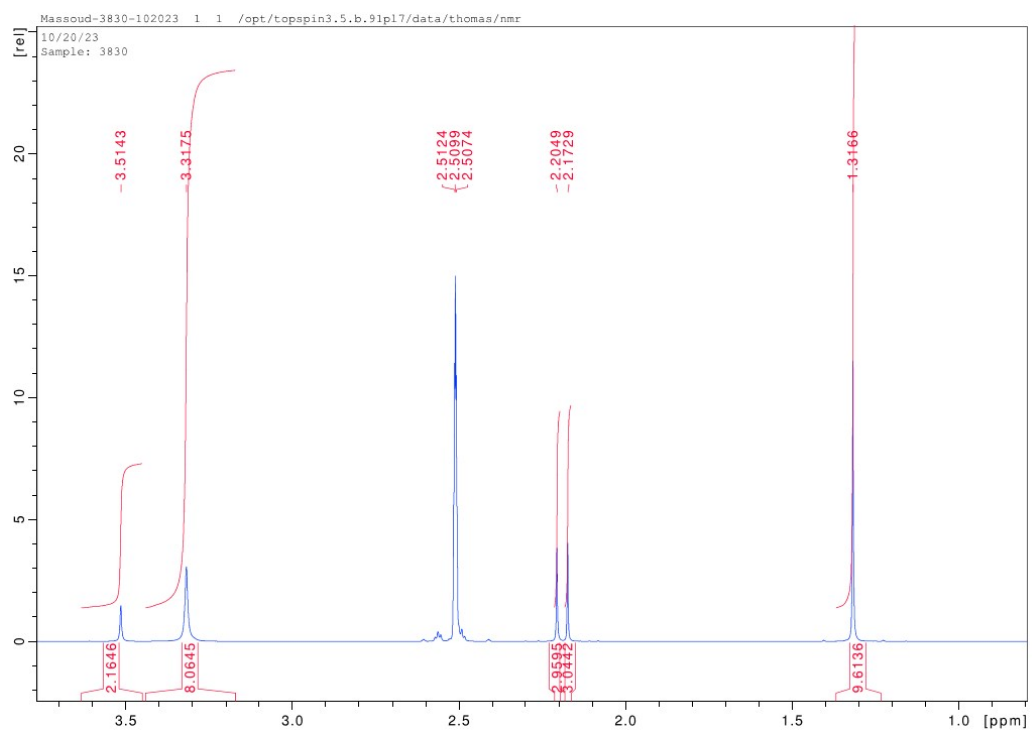

Fig. S2.  $^1\text{H}$  NMR spectra of  $\text{H}_2\text{L}^3$  in  $d_6$ -DMSO.

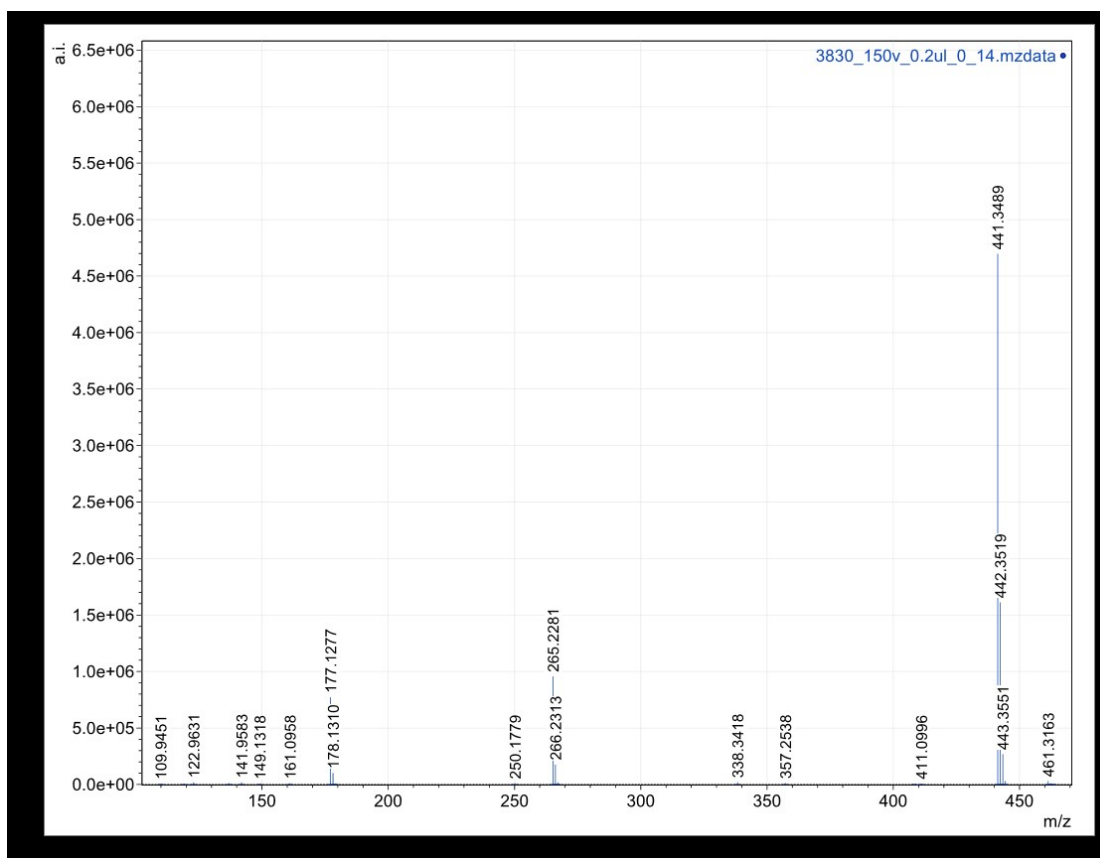

Fig. S3. ESI-MS of  $H_2L^3$  in  $CH_3OH$ .

Peak Find - 3681.jws

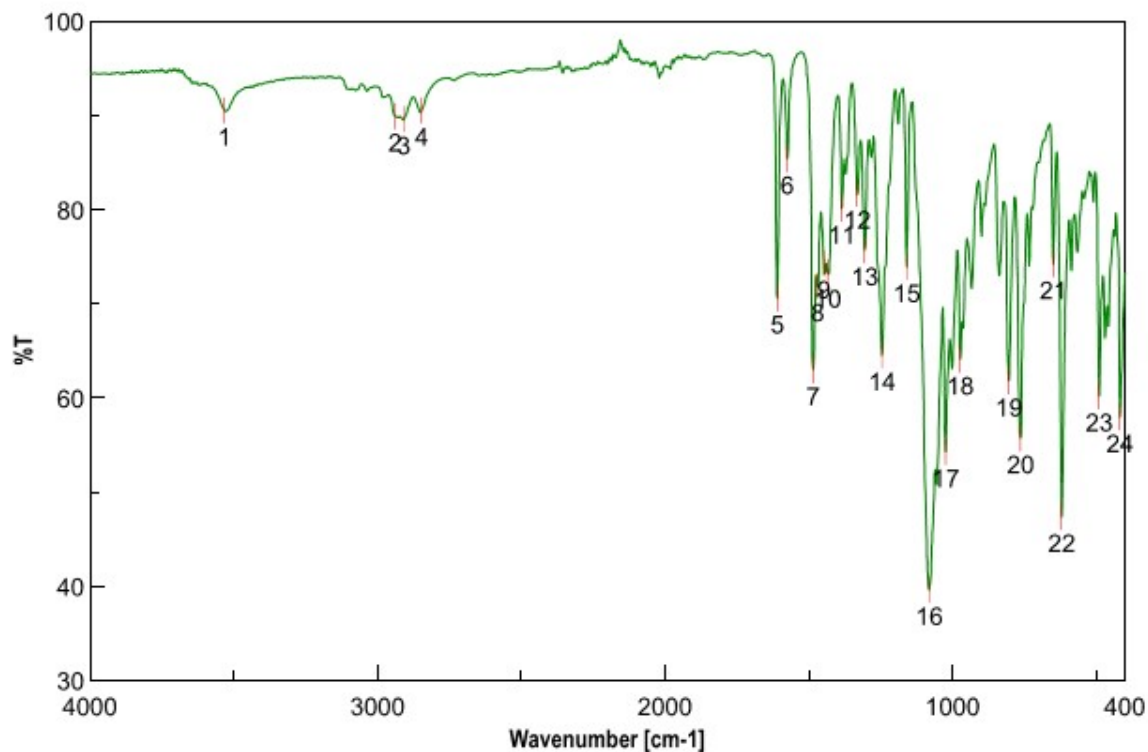

[ Result of Peak Picking ]

| No. | Position | Intensity | No. | Position | Intensity |
|-----|----------|-----------|-----|----------|-----------|
| 1   | 3531.99  | 90        | 2   | 2938.98  | 90        |
| 3   | 2908.13  | 90        | 4   | 2846.42  | 90        |
| 5   | 1609.31  | 71        | 6   | 1574.59  | 85        |
| 7   | 1484.92  | 63        | 8   | 1469.49  | 72        |
| 9   | 1447.31  | 74        | 10  | 1433.82  | 73        |
| 11  | 1384.64  | 80        | 12  | 1331.61  | 82        |
| 13  | 1305.57  | 76        | 14  | 1244.83  | 64        |
| 15  | 1159.01  | 74        | 16  | 1080.91  | 40        |
| 17  | 1024.02  | 54        | 18  | 972.912  | 64        |
| 19  | 804.171  | 62        | 20  | 763.673  | 56        |
| 21  | 649.893  | 74        | 22  | 620.002  | 47        |
| 23  | 489.831  | 60        | 24  | 417.513  | 58        |

Fig. S4. IR spectrum of  $[\text{Zn}_2(\text{L}^1)_2](\text{ClO}_4)_2$  (**1**)

Agilent Resolutions Pro

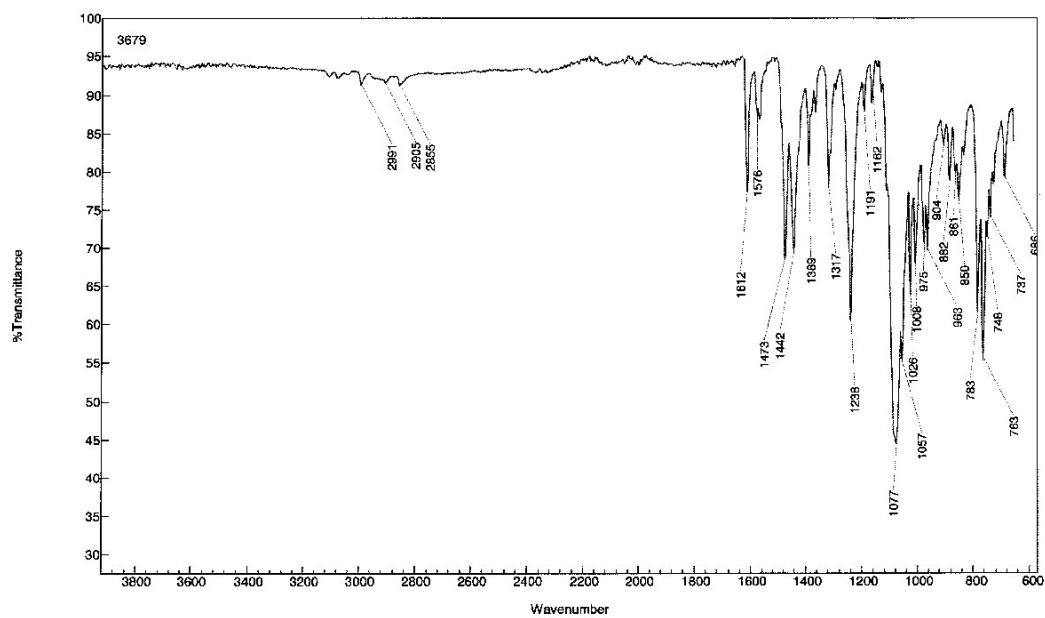

|      |
|------|
| Name |
| 3679 |

Fig. S5. IR spectrum of  $[Zn_2(L^2)_2](ClO_4)_2$  (**2**)



Peak Find - 3835.jws

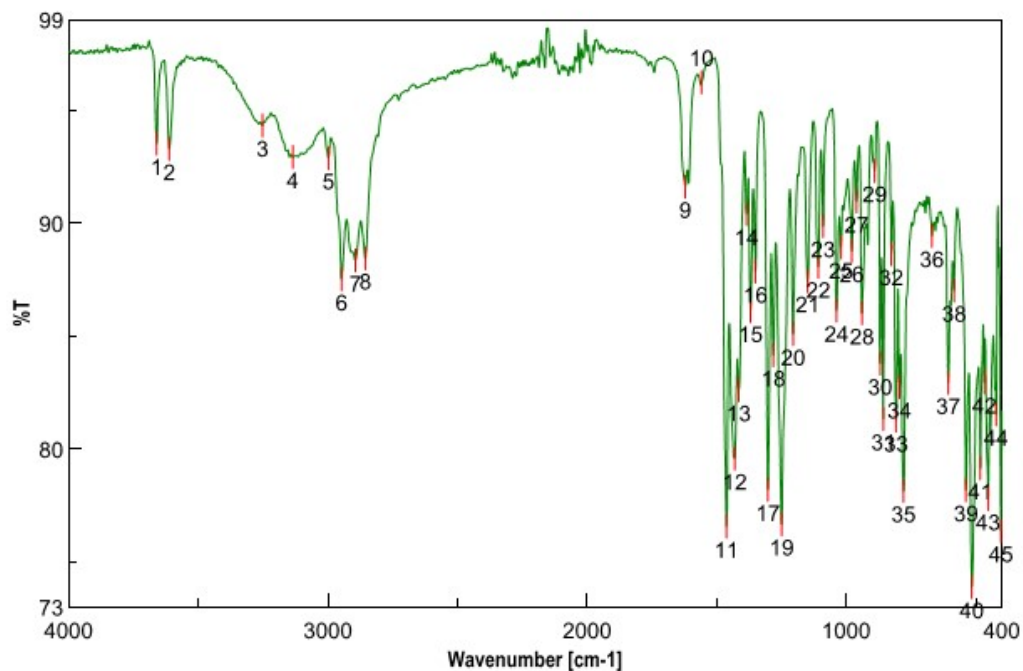

[ Result of Peak Picking ]

| No. | Position | Intensity | No. | Position | Intensity |
|-----|----------|-----------|-----|----------|-----------|
| 1   | 3660.23  | 94        | 2   | 3611.05  | 93        |
| 3   | 3252.36  | 94        | 4   | 3134.72  | 93        |
| 5   | 2997.8   | 93        | 6   | 2946.7   | 88        |
| 7   | 2893.66  | 88        | 8   | 2855.1   | 88        |
| 9   | 1620.88  | 92        | 10  | 1558.2   | 96        |
| 11  | 1461.78  | 77        | 12  | 1429.96  | 80        |
| 13  | 1414.53  | 83        | 14  | 1384.64  | 90        |
| 15  | 1369.21  | 86        | 16  | 1350.89  | 88        |
| 17  | 1301.72  | 78        | 18  | 1281.47  | 84        |
| 19  | 1249.65  | 77        | 20  | 1205.29  | 85        |
| 21  | 1149.37  | 87        | 22  | 1107.9   | 88        |
| 23  | 1089.58  | 90        | 24  | 1037.52  | 86        |
| 25  | 1020.16  | 89        | 26  | 978.697  | 89        |
| 27  | 960.377  | 91        | 28  | 939.163  | 86        |
| 29  | 890.952  | 92        | 30  | 868.774  | 84        |
| 31  | 857.204  | 81        | 32  | 826.348  | 89        |
| 33  | 808.028  | 81        | 34  | 794.528  | 83        |
| 35  | 779.101  | 78        | 36  | 669.178  | 89        |
| 37  | 606.503  | 83        | 38  | 584.325  | 87        |
| 39  | 538.042  | 78        | 40  | 515.865  | 74        |
| 41  | 483.081  | 79        | 42  | 467.653  | 83        |
| 43  | 452.225  | 78        | 44  | 421.37   | 82        |
| 45  | 403.05   | 76        |     |          |           |

Fig. S6. IR spectrum of  $[\text{Zn}(\text{L}^3)(\text{H}_2\text{O})] \cdot \text{CH}_3\text{OH}$  (**3**).

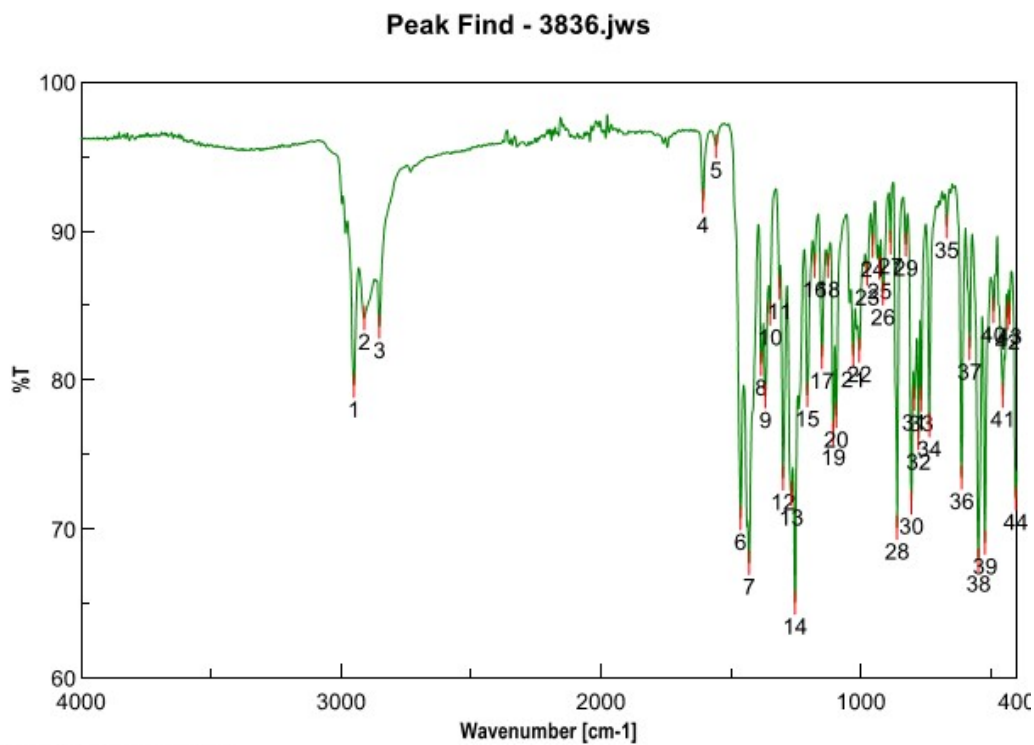

[ Result of Peak Picking ]

| No. | Position | Intensity | No. | Position | Intensity |
|-----|----------|-----------|-----|----------|-----------|
| 1   | 2950.55  | 80        | 2   | 2911.02  | 84        |
| 3   | 2852.2   | 84        | 4   | 1607.38  | 92        |
| 5   | 1557.24  | 96        | 6   | 1463.71  | 71        |
| 7   | 1429.96  | 68        | 8   | 1383.68  | 81        |
| 9   | 1367.28  | 79        | 10  | 1348.96  | 84        |
| 11  | 1313.29  | 86        | 12  | 1298.82  | 73        |
| 13  | 1267.97  | 72        | 14  | 1253.5   | 65        |
| 15  | 1206.26  | 79        | 16  | 1178.29  | 88        |
| 17  | 1149.37  | 82        | 18  | 1127.19  | 88        |
| 19  | 1105.98  | 76        | 20  | 1094.4   | 78        |
| 21  | 1028.84  | 82        | 22  | 1005.7   | 82        |
| 23  | 975.804  | 87        | 24  | 954.591  | 89        |
| 25  | 928.557  | 88        | 26  | 915.058  | 86        |
| 27  | 886.131  | 89        | 28  | 860.096  | 70        |
| 29  | 827.312  | 89        | 30  | 805.135  | 72        |
| 31  | 794.528  | 79        | 32  | 778.136  | 76        |
| 33  | 767.53   | 79        | 34  | 736.674  | 77        |
| 35  | 669.178  | 90        | 36  | 612.288  | 73        |
| 37  | 581.433  | 82        | 38  | 547.685  | 68        |
| 39  | 522.615  | 69        | 40  | 489.831  | 85        |
| 41  | 453.19   | 79        | 42  | 435.834  | 84        |
| 43  | 427.155  | 85        | 44  | 403.05   | 72        |

**Fig. S7.** IR spectrum of [Zn(L<sup>4</sup>)] (**4**).

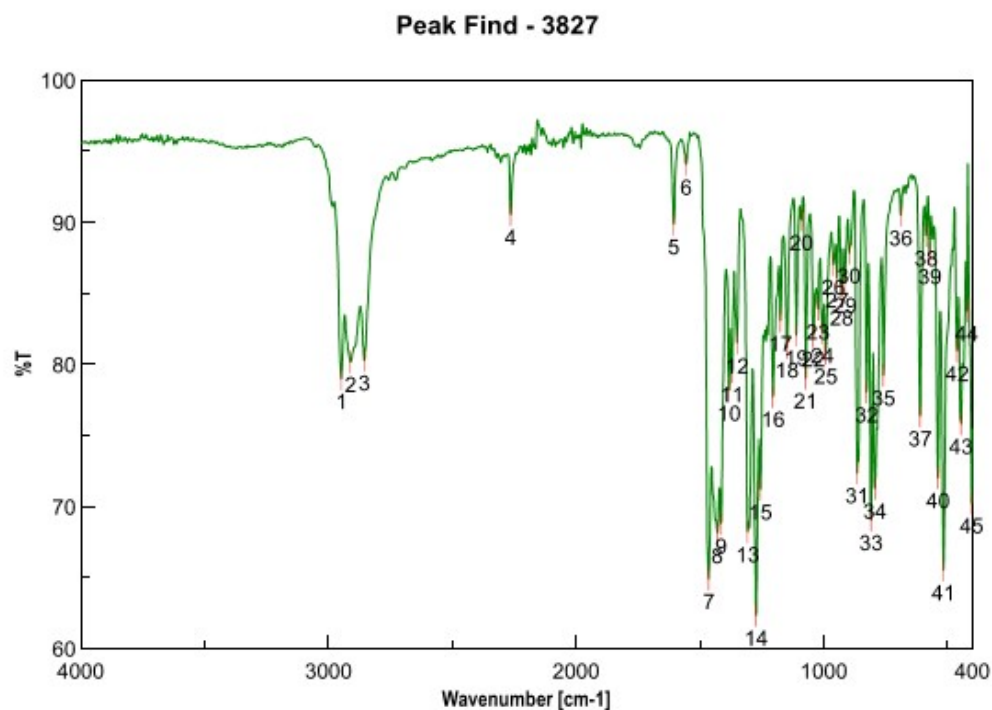

[ Result of Peak Picking ]

| No. | Position | Intensity | No. | Position | Intensity |
|-----|----------|-----------|-----|----------|-----------|
| 1   | 2947.66  | 79        | 2   | 2911.02  | 80        |
| 3   | 2855.1   | 80        | 4   | 2264.02  | 91        |
| 5   | 1606.41  | 90        | 6   | 1556.27  | 94        |
| 7   | 1464.67  | 65        | 8   | 1429.96  | 68        |
| 9   | 1415.49  | 69        | 10  | 1382.71  | 78        |
| 11  | 1371.14  | 79        | 12  | 1349.93  | 81        |
| 13  | 1307.5   | 68        | 14  | 1272.79  | 62        |
| 15  | 1256.4   | 71        | 16  | 1205.29  | 78        |
| 17  | 1174.44  | 83        | 18  | 1148.4   | 81        |
| 19  | 1110.8   | 82        | 20  | 1091.51  | 90        |
| 21  | 1073.19  | 79        | 22  | 1042.34  | 82        |
| 23  | 1024.02  | 84        | 24  | 1005.7   | 82        |
| 25  | 992.196  | 81        | 26  | 960.377  | 87        |
| 27  | 945.913  | 86        | 28  | 928.557  | 85        |
| 29  | 915.058  | 86        | 30  | 897.701  | 88        |
| 31  | 865.882  | 72        | 32  | 827.312  | 78        |
| 33  | 808.992  | 69        | 34  | 793.564  | 71        |
| 35  | 758.852  | 79        | 36  | 689.427  | 90        |
| 37  | 611.324  | 76        | 38  | 587.218  | 89        |
| 39  | 572.755  | 88        | 40  | 539.007  | 72        |
| 41  | 516.829  | 65        | 42  | 461.868  | 81        |
| 43  | 445.476  | 76        | 44  | 423.298  | 84        |
| 45  | 403.05   | 70        |     |          |           |

**Fig. S8.** IR spectrum of  $[Zn(L^5)]$  (**5**).

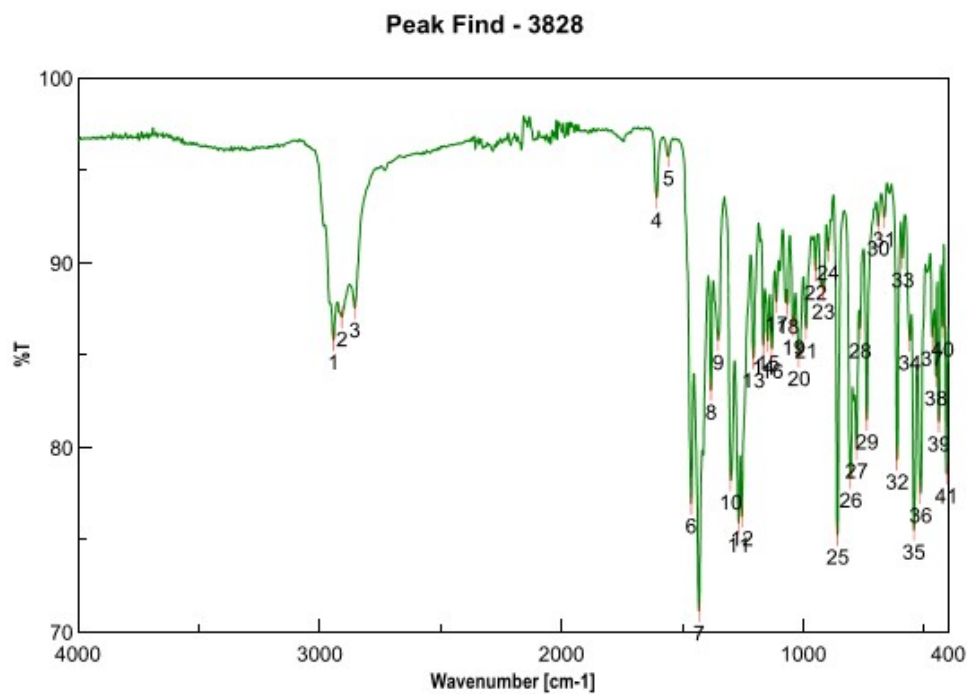

[ Result of Peak Picking ]

| No. | Position | Intensity | No. | Position | Intensity |
|-----|----------|-----------|-----|----------|-----------|
| 1   | 2942.84  | 86        | 2   | 2908.13  | 87        |
| 3   | 2855.1   | 88        | 4   | 1607.38  | 93        |
| 5   | 1558.2   | 96        | 6   | 1463.71  | 77        |
| 7   | 1431.89  | 71        | 8   | 1381.75  | 83        |
| 9   | 1352.82  | 86        | 10  | 1299.79  | 78        |
| 11  | 1267.97  | 76        | 12  | 1254.47  | 76        |
| 13  | 1206.26  | 85        | 14  | 1165.76  | 86        |
| 15  | 1146.47  | 86        | 16  | 1130.08  | 85        |
| 17  | 1110.8   | 88        | 18  | 1065.48  | 88        |
| 19  | 1041.37  | 87        | 20  | 1018.23  | 85        |
| 21  | 989.304  | 86        | 22  | 949.77   | 90        |
| 23  | 916.986  | 89        | 24  | 897.701  | 91        |
| 25  | 858.168  | 75        | 26  | 804.171  | 78        |
| 27  | 780.065  | 80        | 28  | 765.601  | 86        |
| 29  | 737.639  | 81        | 30  | 690.391  | 92        |
| 31  | 666.285  | 92        | 32  | 612.288  | 79        |
| 33  | 589.147  | 90        | 34  | 560.22   | 86        |
| 35  | 542.863  | 76        | 36  | 514.901  | 77        |
| 37  | 467.653  | 86        | 38  | 452.225  | 84        |
| 39  | 439.69   | 81        | 40  | 424.263  | 86        |
| 41  | 408.835  | 79        |     |          |           |

**Fig. S9.** IR spectrum of  $[\text{Zn}(\text{L}^6)]$  (**6**).

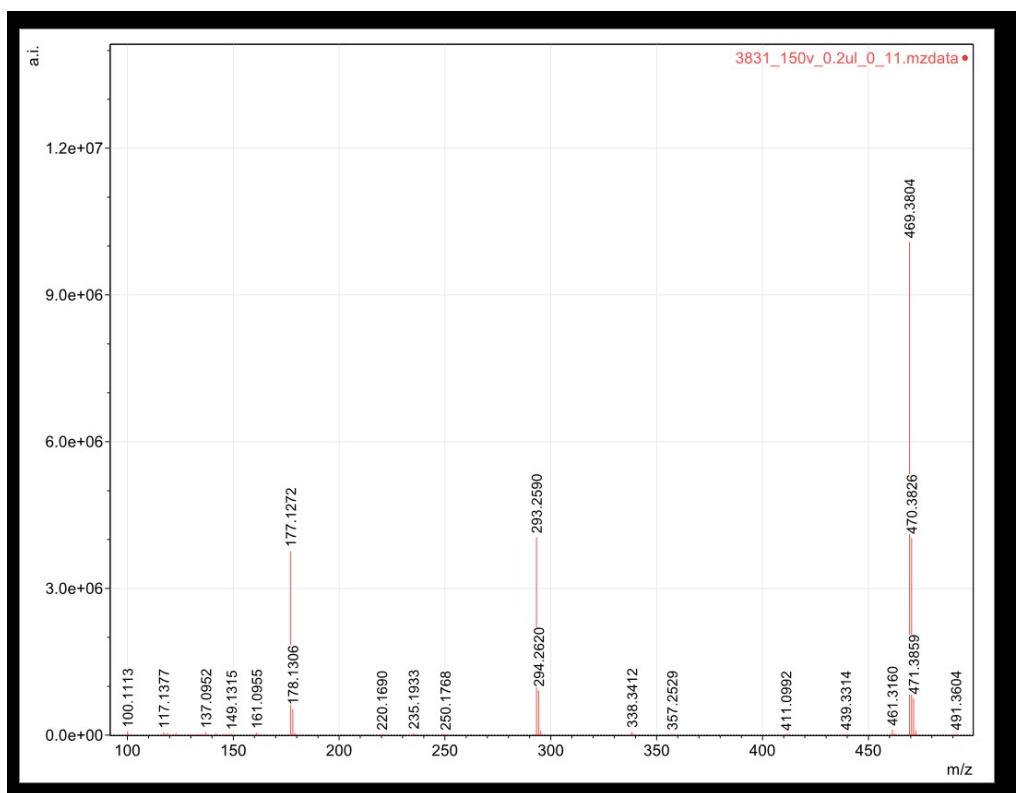

Fig. S10. ESI-MS of  $H_2L^4$  in  $CH_3OH$ .

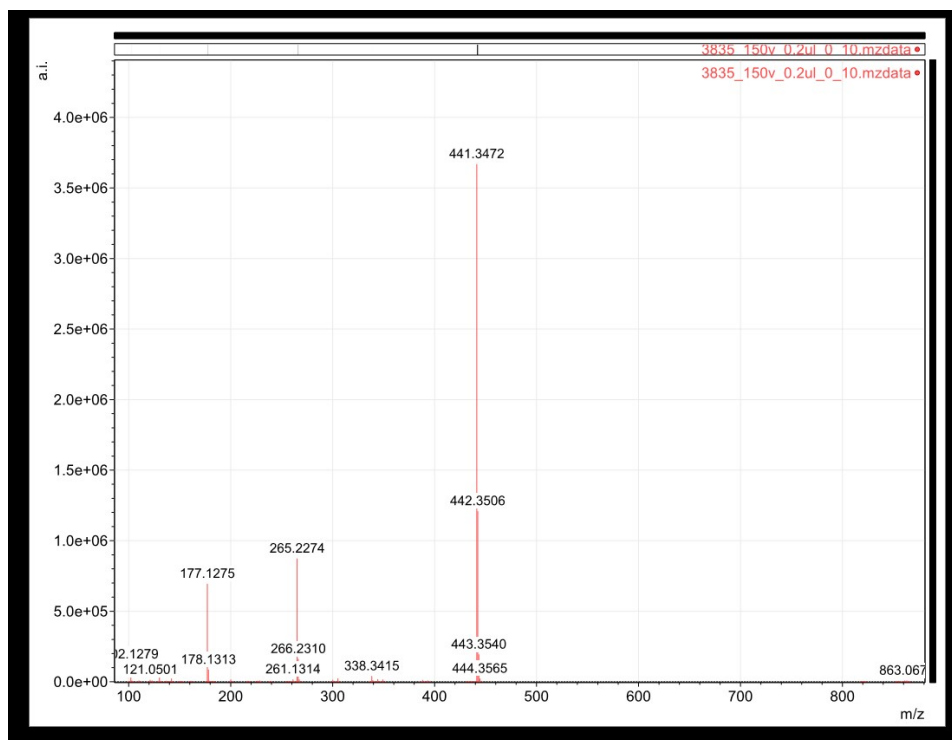

Fig. S11. ESI-MS of complex **3** in  $CH_3CN$ .

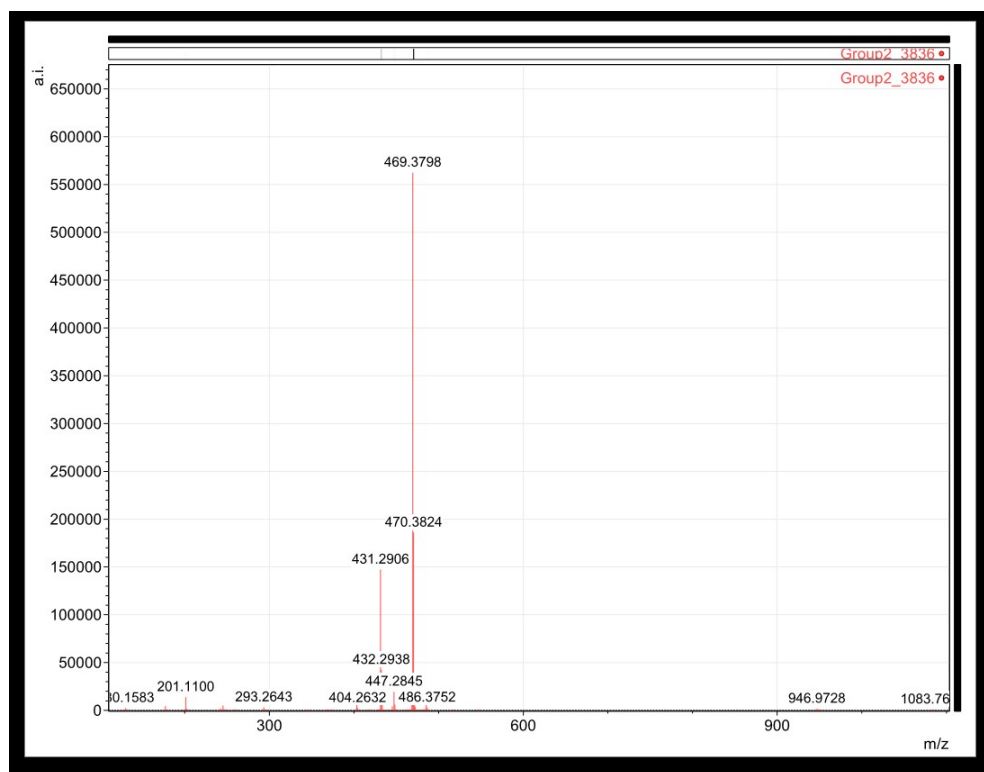

Fig. S12. ESI-MS of complex 4 in CH<sub>3</sub>CN.

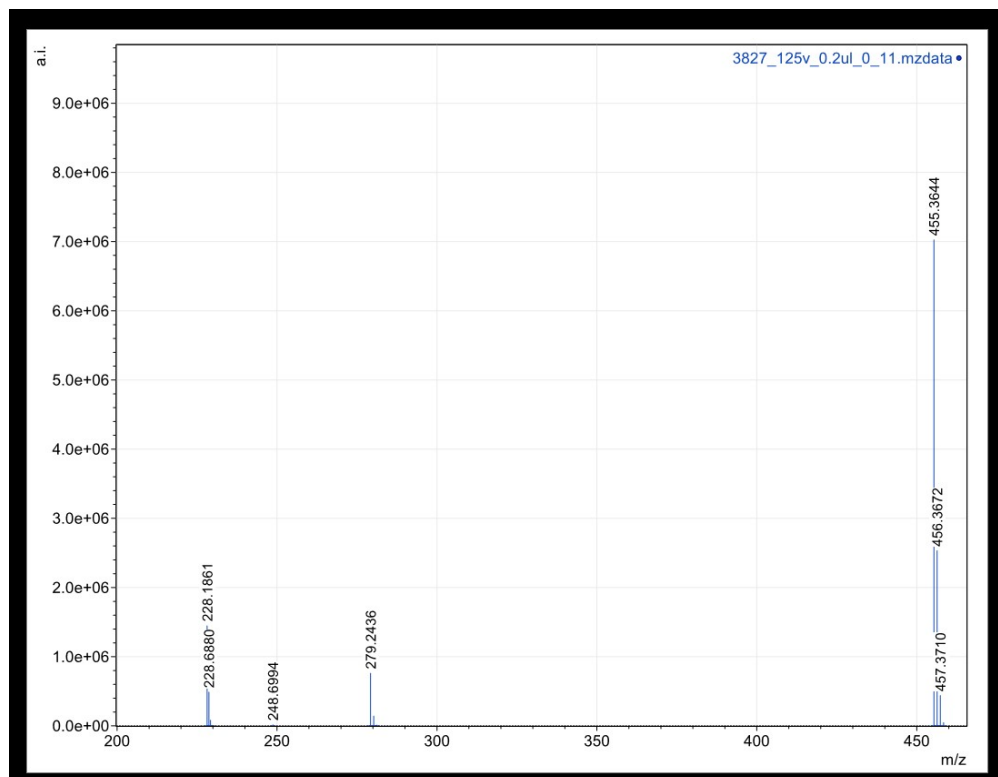

Fig. S13. ESI-MS of complex 5 in CH<sub>3</sub>CN.

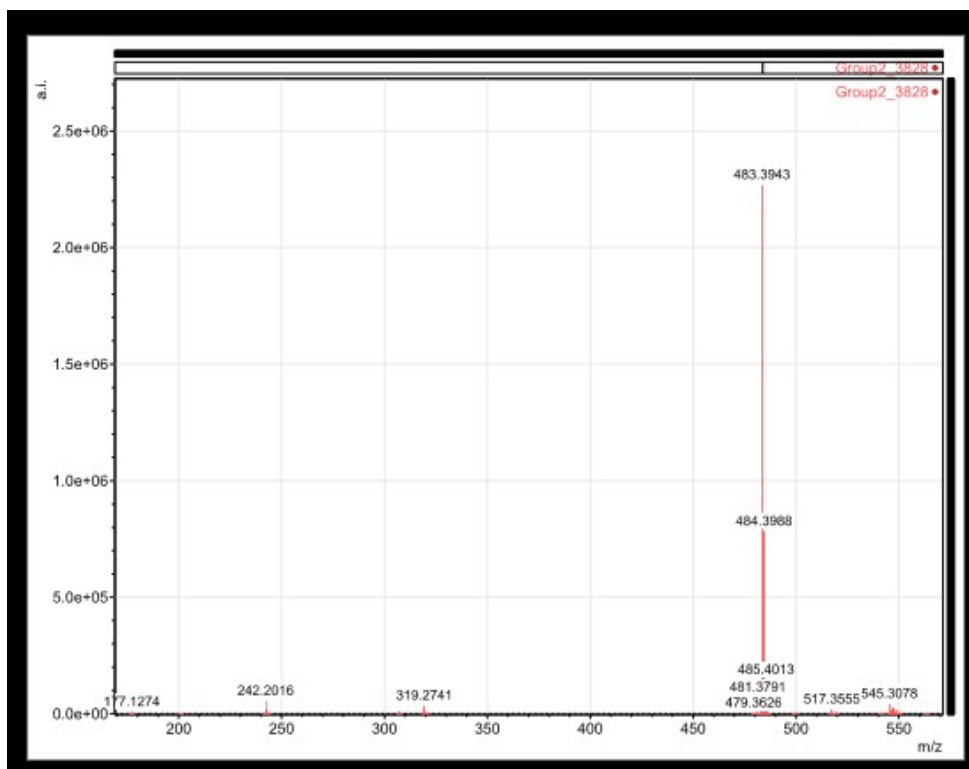

Fig. 14. ESI-MS of complex 6 in CH<sub>3</sub>CN.

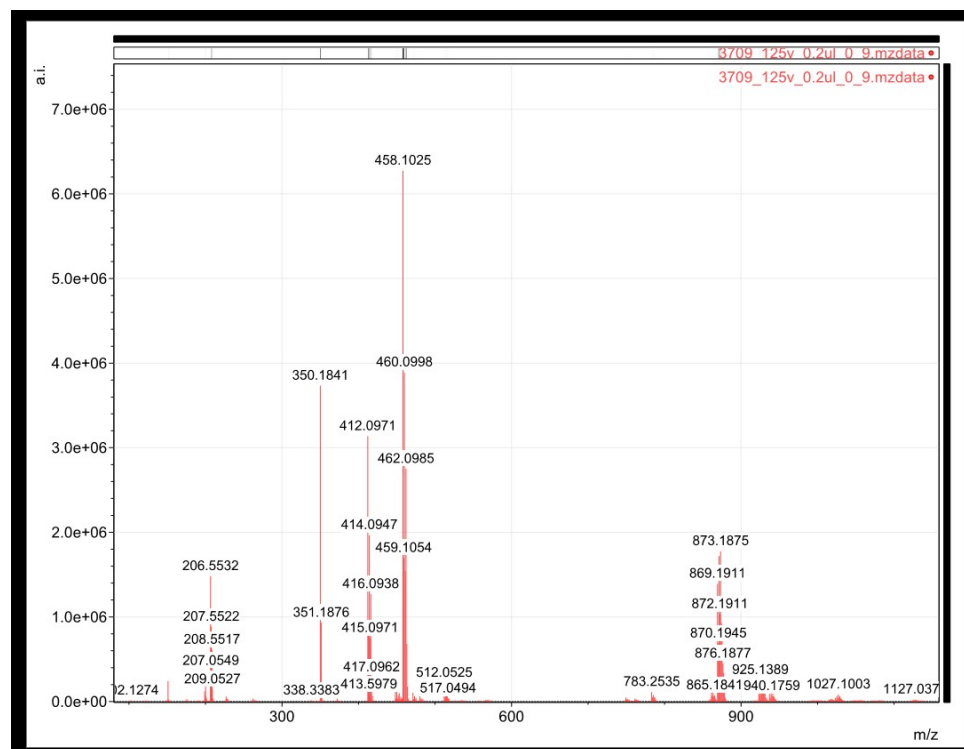

Fig. S15. ESI-MS of 1 in CH<sub>3</sub>CN.

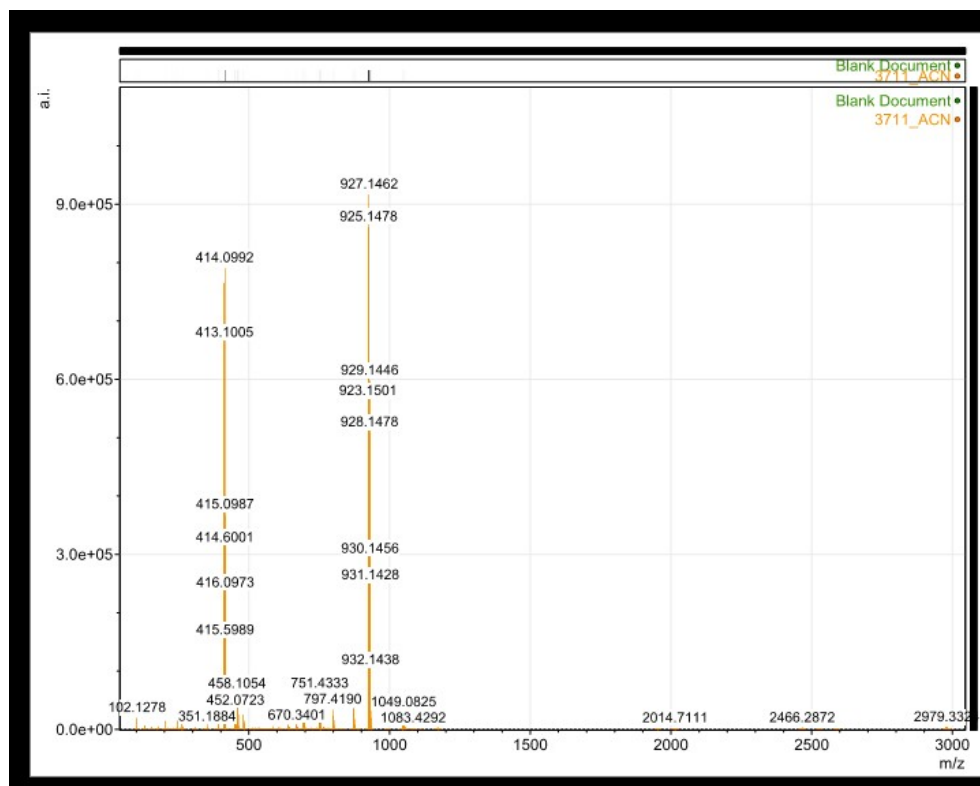

Fig. S16. ESI-MS of complex **2** in a CH<sub>3</sub>CN/HCOOH (1:1) mixture.

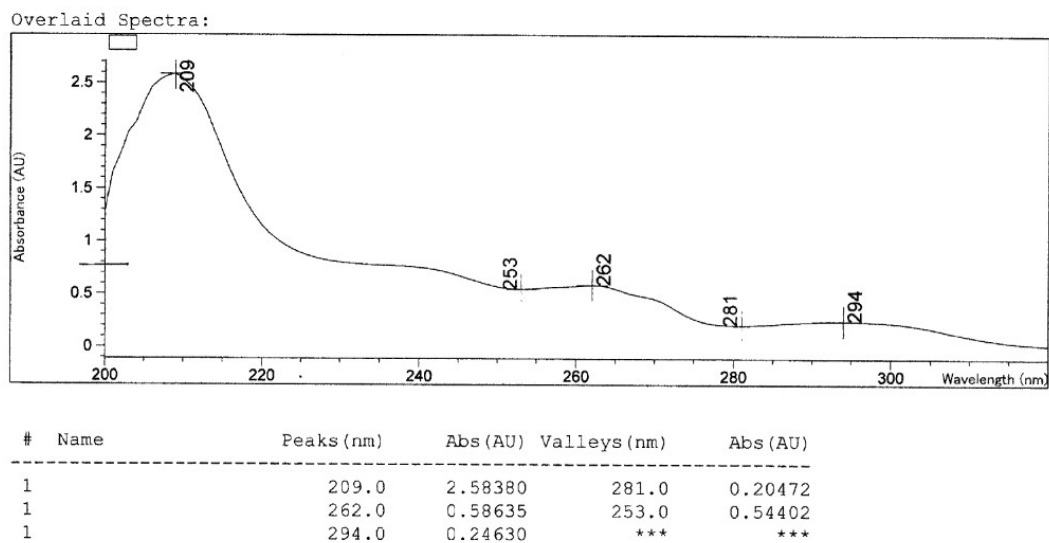

Fig. S17. UV spectrum of **1** ( $3.64 \times 10^{-5}$  M) in MeOH.



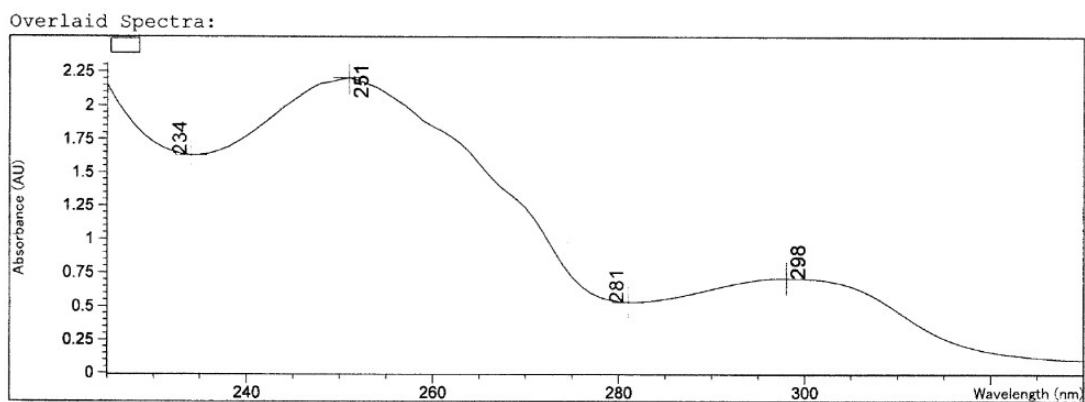

| # | Name | Peaks (nm) | Abs (AU) | Valleys (nm) | Abs (AU) |
|---|------|------------|----------|--------------|----------|
| 1 |      | 251.0      | 2.20330  | 281.0        | 0.53069  |
| 1 |      | 298.0      | 0.70912  | 234.0        | 1.62720  |
| 1 |      | ***        | ***      | ***          | ***      |

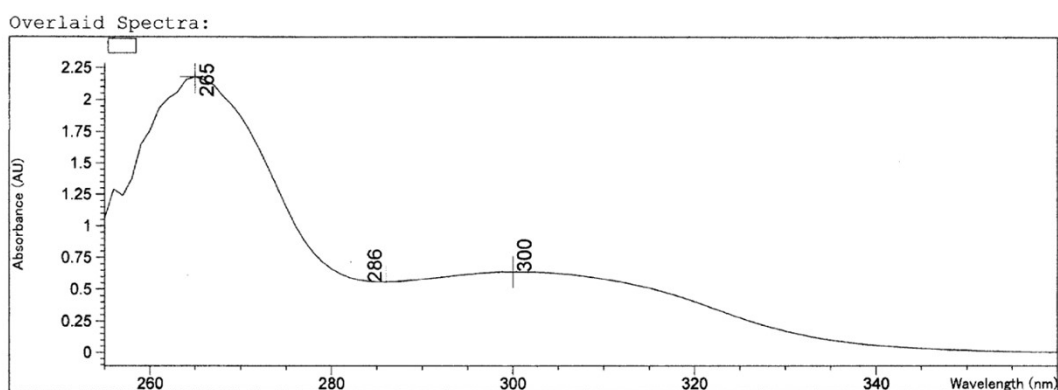

| # | Name | Peaks (nm) | Abs (AU) | Valleys (nm) | Abs (AU) |
|---|------|------------|----------|--------------|----------|
| 1 |      | 265.0      | 2.17680  | 286.0        | 0.55923  |
| 1 |      | 300.0      | 0.63994  | ***          | ***      |
| 1 |      | ***        | ***      | ***          | ***      |

**Fig. S18.** UV spectrum of **2** in CH<sub>3</sub>CN ( $8.994 \times 10^{-5}$  M) (*top*) and in DMSO ( $1.04 \times 10^{-4}$  M) (*bottom*).

Overlaid Spectra:

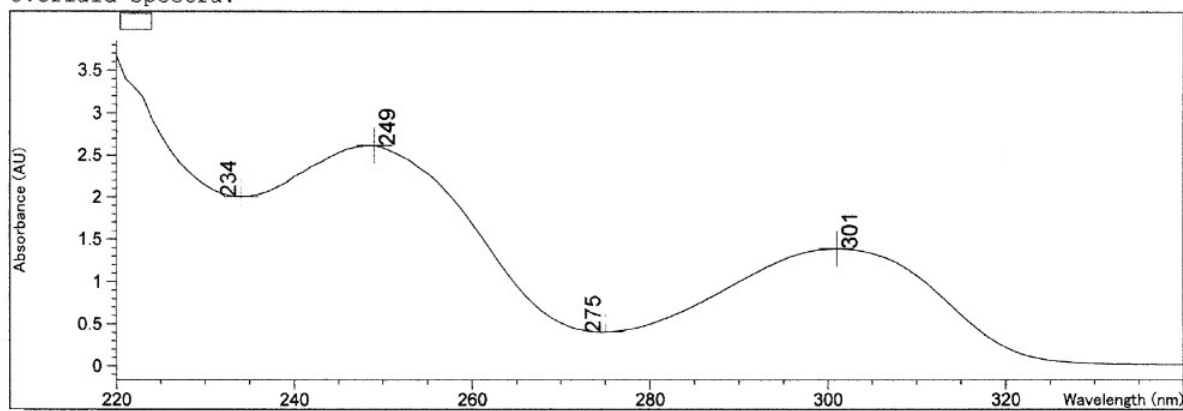

| # | Name | Peaks (nm) | Abs (AU) | Valleys (nm) | Abs (AU) |
|---|------|------------|----------|--------------|----------|
| 1 |      | 249.0      | 2.61770  | 275.0        | 0.40479  |
| 1 |      | 301.0      | 1.38960  | 234.0        | 2.00040  |
| 1 |      | ***        | ***      | ***          | ***      |

**Fig. S19.** UV spectrum of **4** in CH<sub>3</sub>CN ( $2.067 \times 10^{-4}$  M).

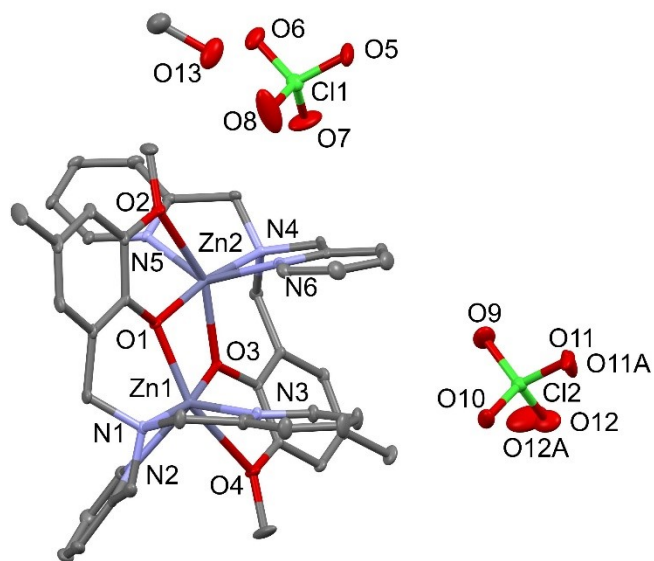

**Fig. S20:** ORTEP view of **1** showing also disordered parts of the complex.

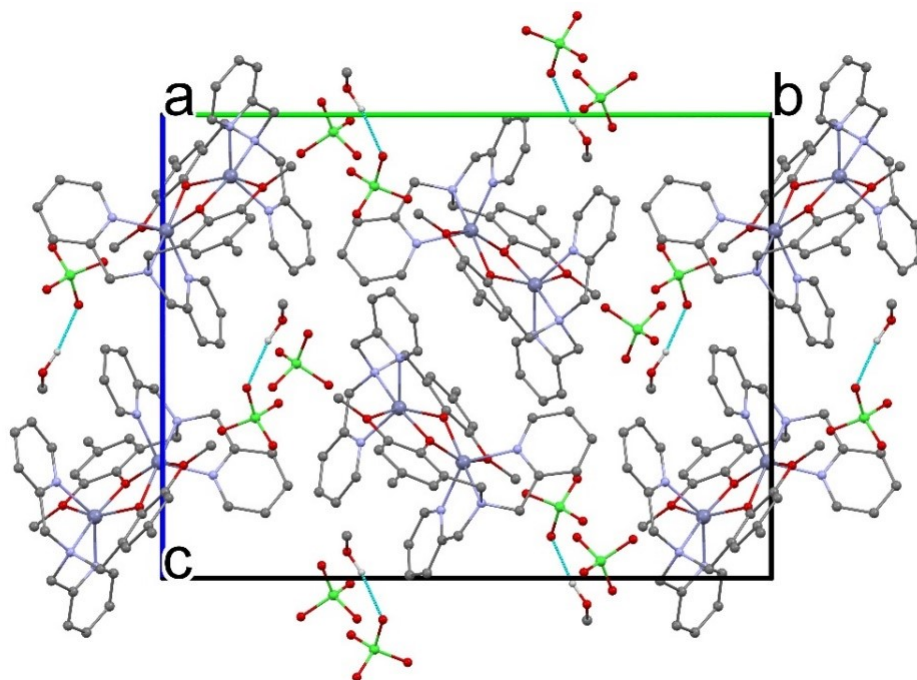

Fig. S21. Packing plot of 1.

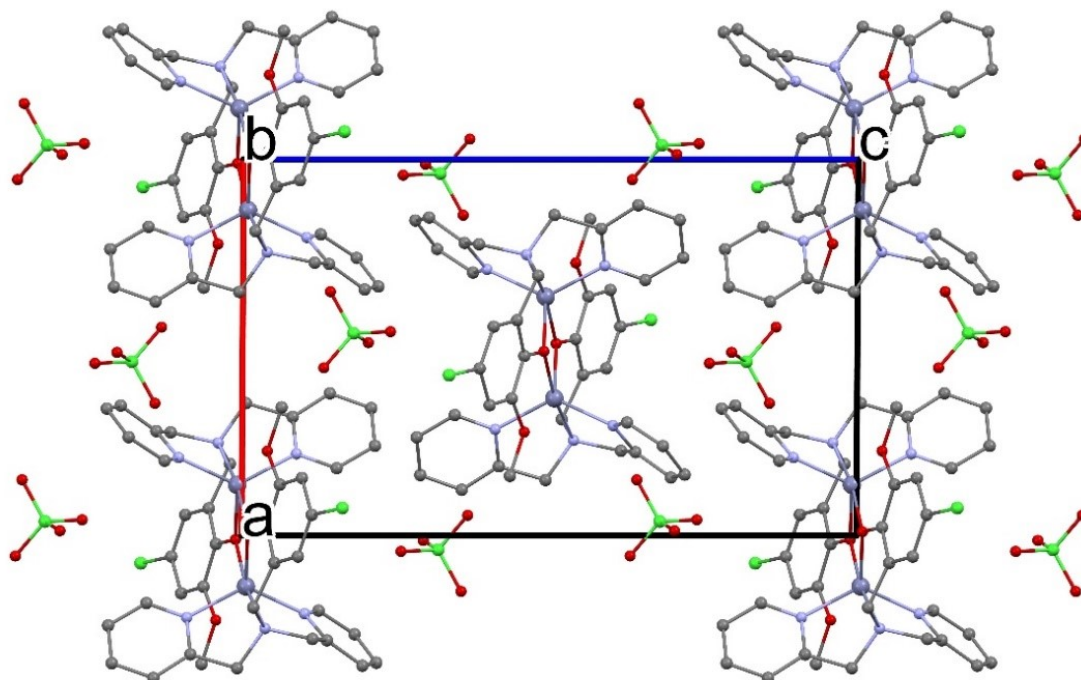

Fig. S22. Packing plot of 2.

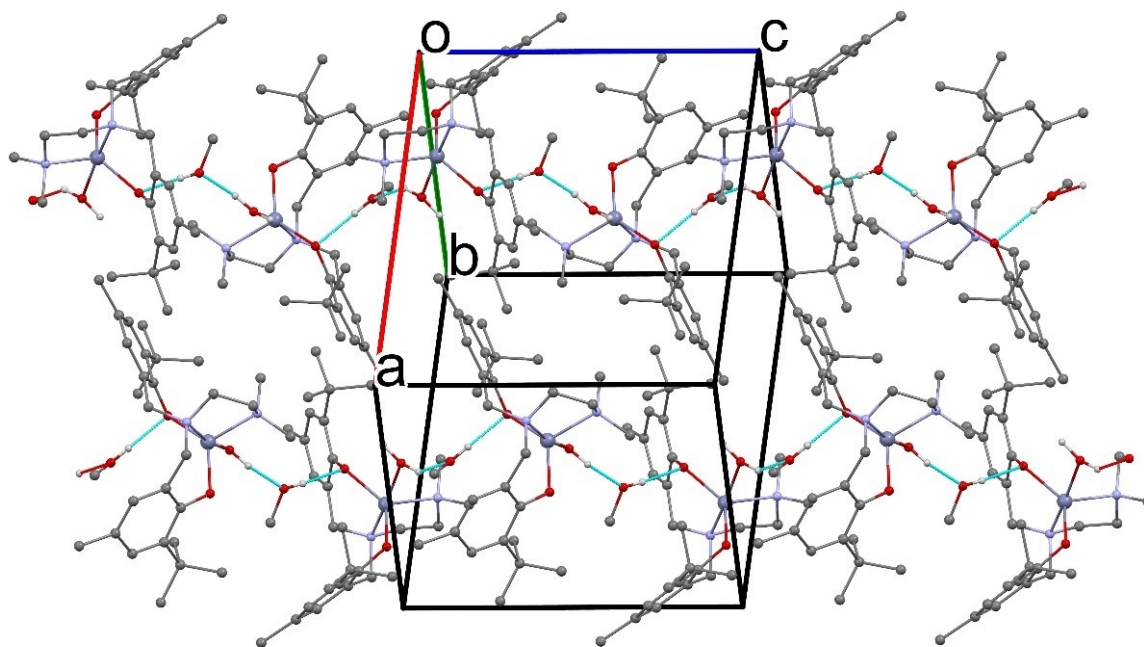

Fig. S23. Packing plot of 3.

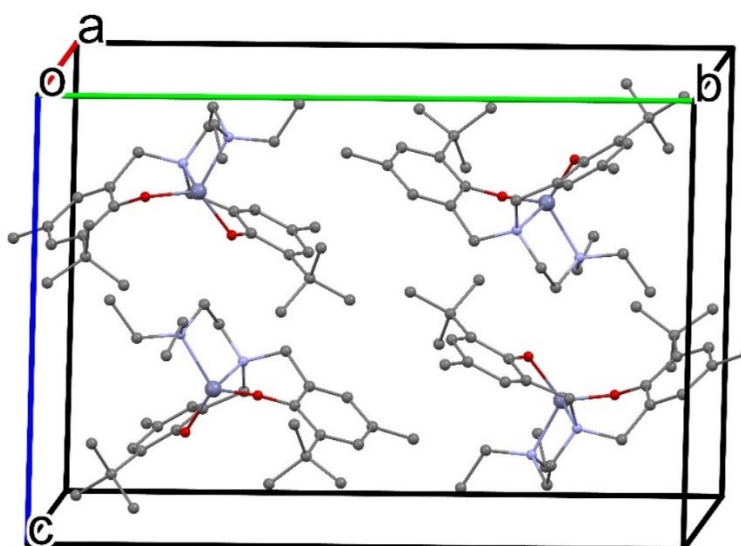

Fig. S24. Packing plot of 4.

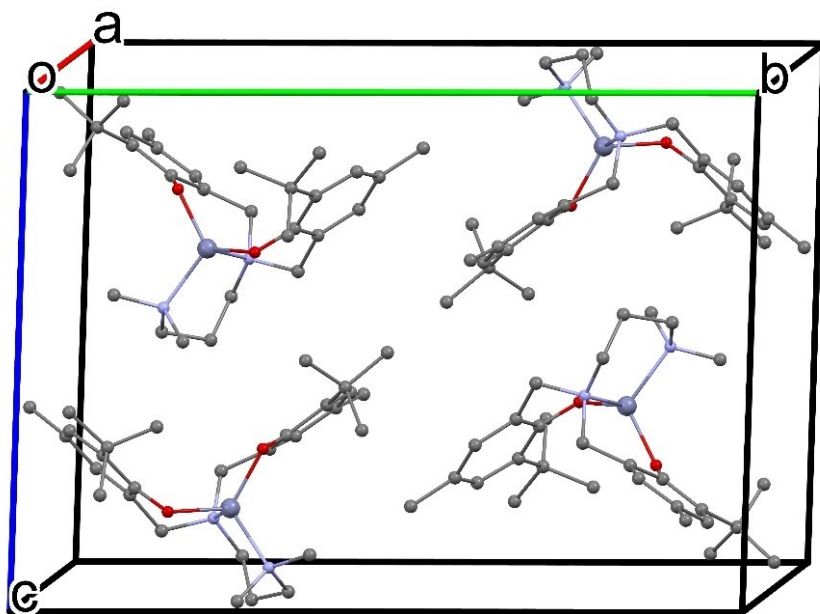

Fig. S25. Packing plot of 5.

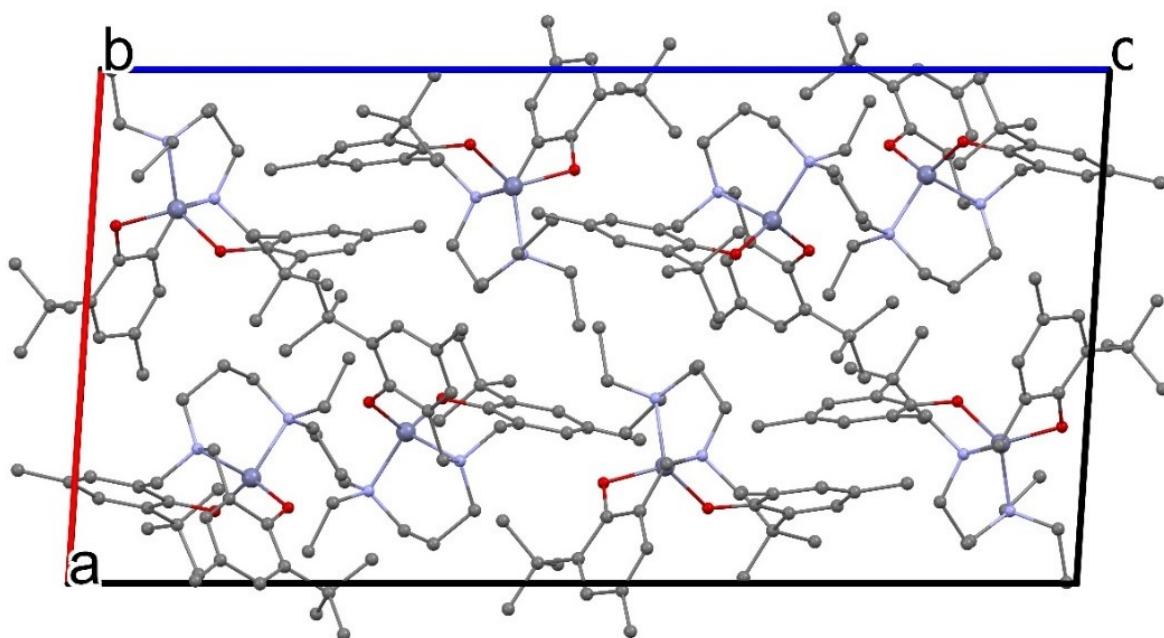

Fig. S26. Packing plot of 6.

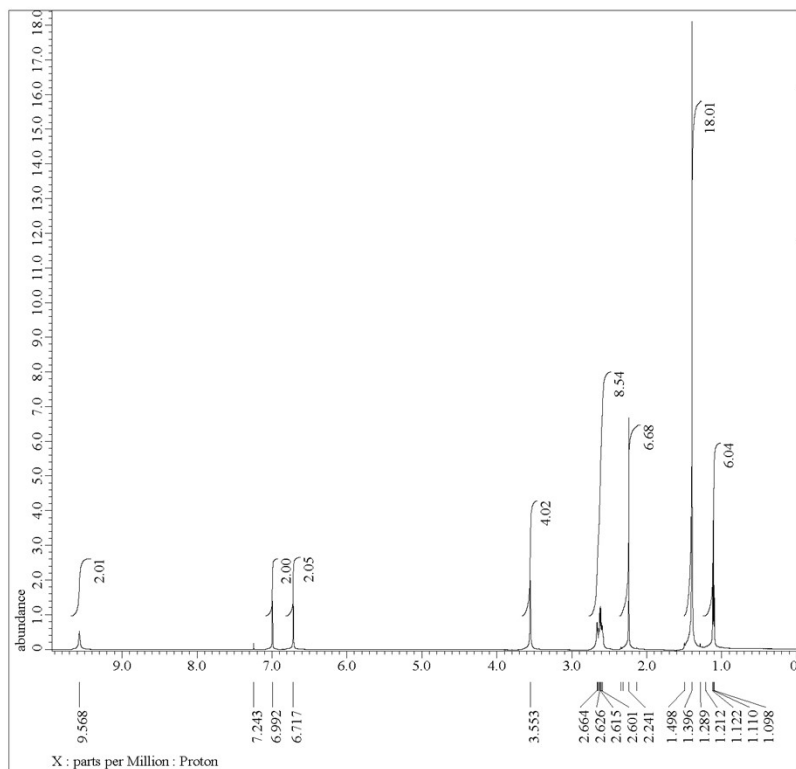

Fig. S27. <sup>1</sup>H NMR spectrum of free H<sub>2</sub>L<sup>4</sup> measured in CDCl<sub>3</sub>.

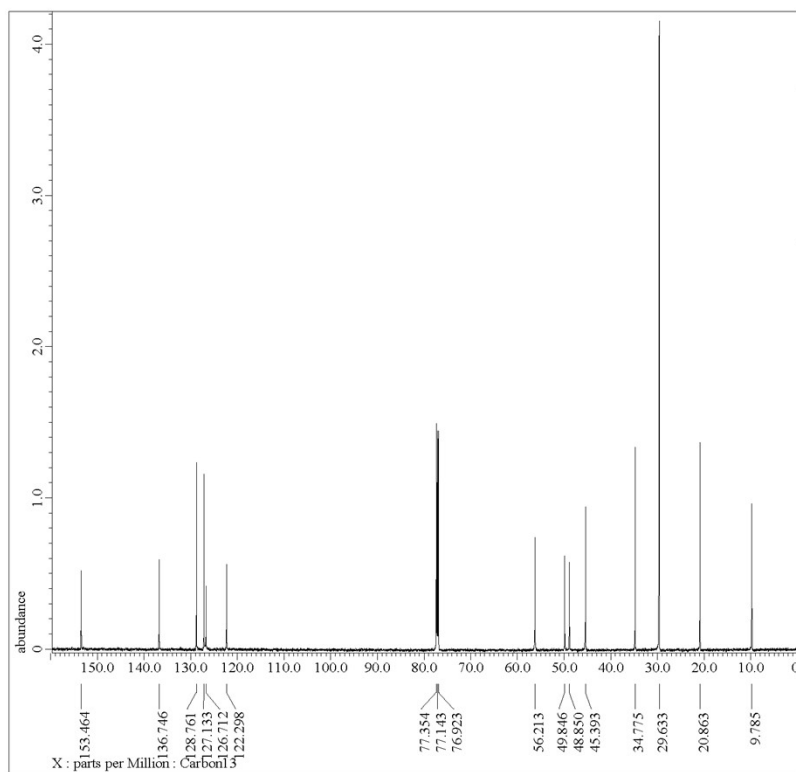

Fig. S28. <sup>13</sup>C NMR spectrum of free H<sub>2</sub>L<sup>4</sup> measured in CDCl<sub>3</sub>.

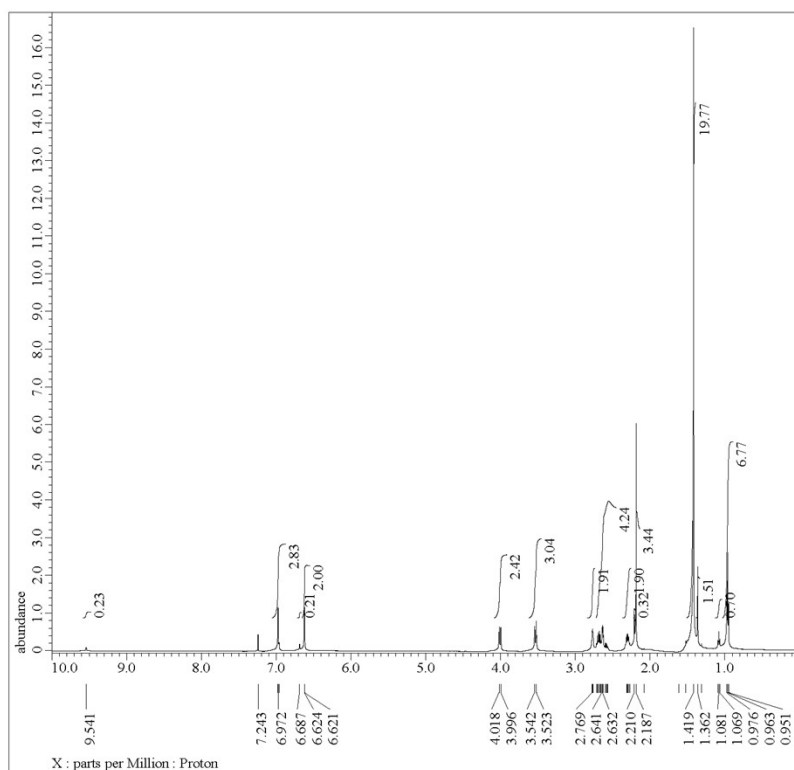

**Fig. S29.**  $^1\text{H}$  NMR spectrum of  $[\text{Zn}(\text{L}^4)]$  (**4**) measured in  $\text{CDCl}_3$  immediately after the sample dissolution.

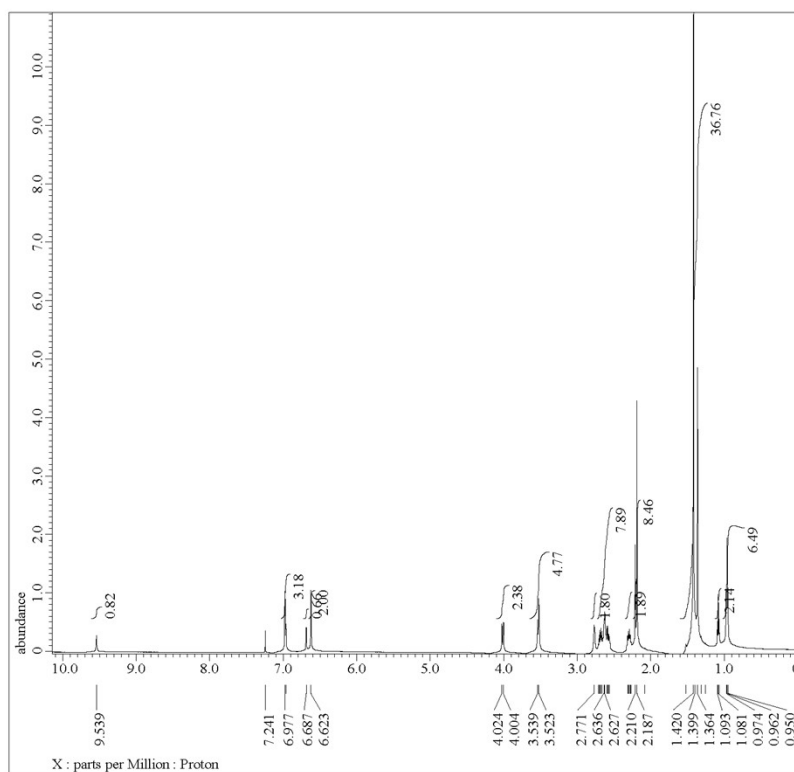

**Fig. S30.**  $^1\text{H}$  NMR spectrum of  $[\text{Zn}(\text{L}^4)]$  (**4**) measured in  $\text{CDCl}_3$  22 h after the sample dissolution.

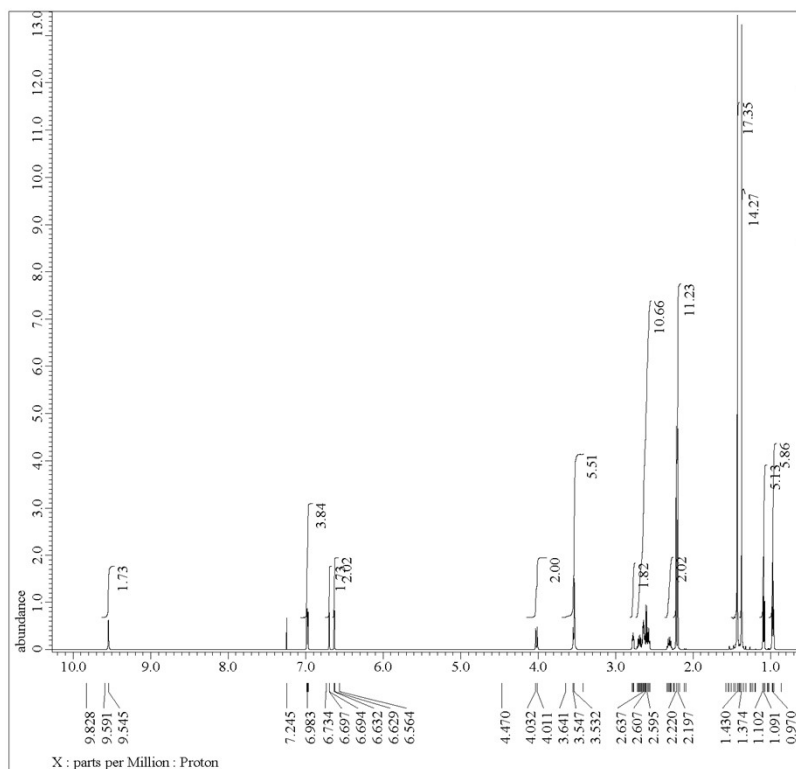

**Fig. S31.** <sup>1</sup>H NMR spectrum of [Zn(L<sup>4</sup>)] (4) measured in CDCl<sub>3</sub> 6 days after the sample dissolution.

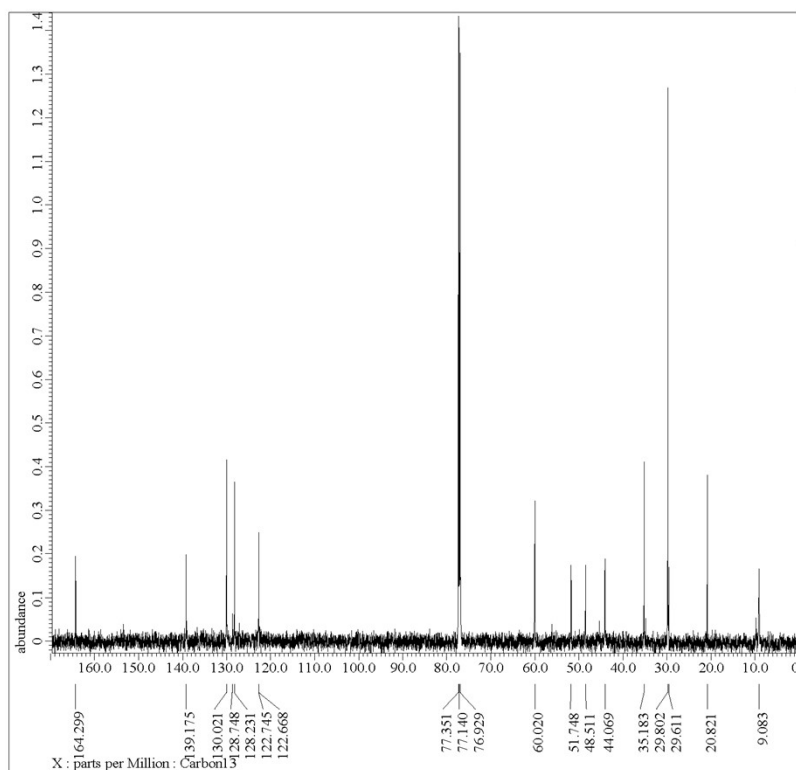

**Fig. S32.** <sup>13</sup>C NMR spectrum of [Zn(L<sup>4</sup>)] (4) measured in CDCl<sub>3</sub> immediately after the sample dissolution.



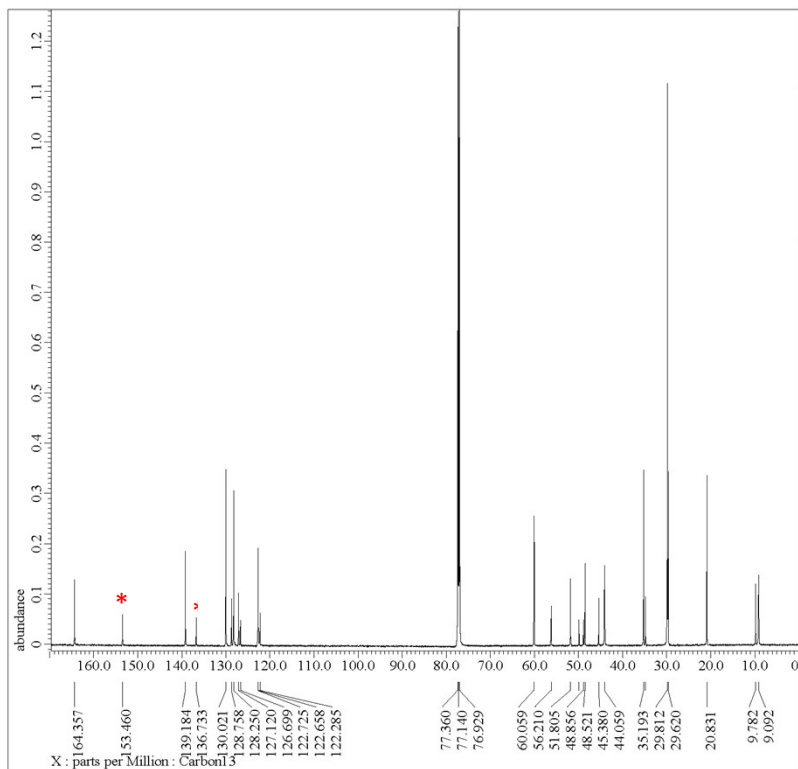

**Fig. S33.** <sup>13</sup>C NMR spectrum of **[Zn(L<sup>4</sup>)] (4)** measured in CDCl<sub>3</sub> 22 h after the sample dissolution. \*The selected signals belonging to the free H<sub>2</sub>L<sup>4</sup> ligand.

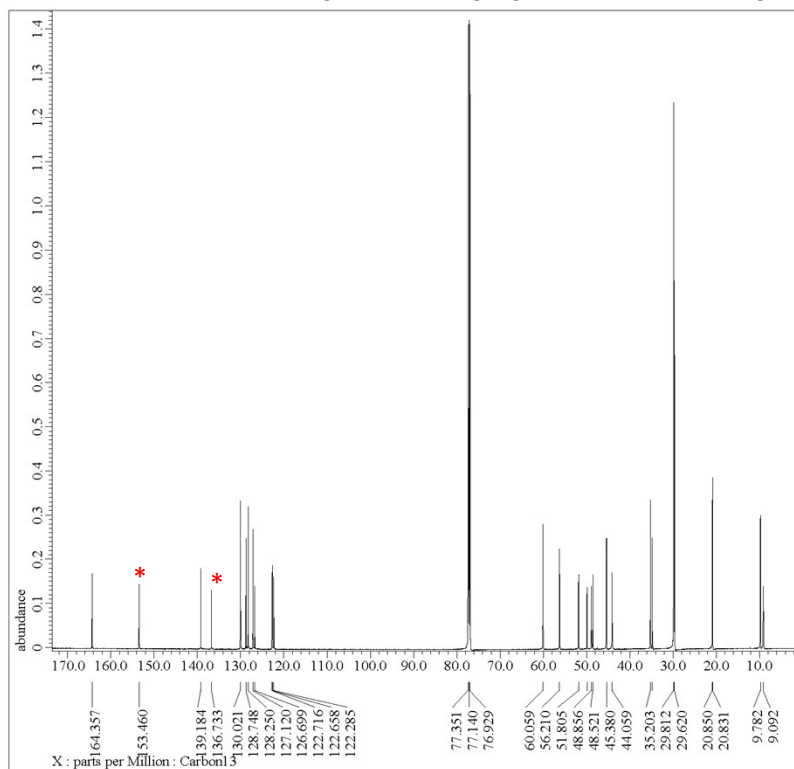

**Fig. S34.** <sup>13</sup>C NMR spectrum of **[Zn(L<sup>4</sup>)] (4)** measured in CDCl<sub>3</sub> 6 days after the sample dissolution. \*The selected signals belonging to the free H<sub>2</sub>L<sup>4</sup> ligand.

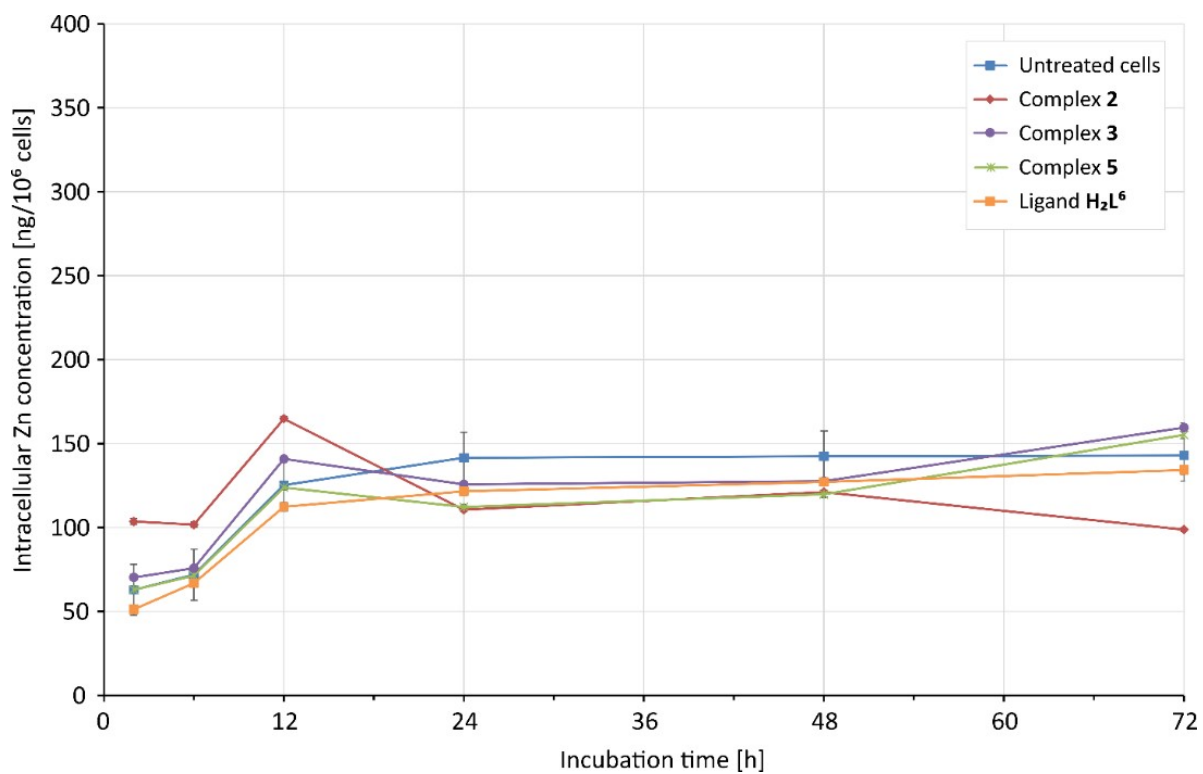

**Fig. S35.** The effect of complexes **2**, **3**, and **5**, and ligand **H<sub>2</sub>L<sup>6</sup>** on intracellular levels of zinc in A2780 cells incubated with half-toxic concentrations of the compounds for 2, 6, 12, 24, 48, and 72 h. The determined values are averages from three parallel determinations  $\pm$  standard deviation.
